# Supplementary material for: Effects of different extrusion temperatures on the physicochemical properties, edible quality and digestive attributes of multigrain reconstituted rice
Source: Royal Society of Chemistry journal article supplement (doi:10.1039/d4fo00044g), 2024-01-01
Supplement: d4fo00044g1.pdf [file d4fo00044g1.pdf]

## Supplementary materials

**Table S1** Hydrolysis rate of the multigrain reconstituted rice at different extrusion temperatures.

| Samples | T60                      | T70                      | T80                      | T90                      | T100                     | T110                     | T120                    |
|---------|--------------------------|--------------------------|--------------------------|--------------------------|--------------------------|--------------------------|-------------------------|
| 0min    | 3.02±0.01 <sup>d</sup>   | 3.01±0.05 <sup>d</sup>   | 3.45±0.06 <sup>e</sup>   | 3.55±0.29 <sup>bc</sup>  | 3.83±0.20 <sup>abc</sup> | 3.96±0.20 <sup>a</sup>   | 3.92±0.33 <sup>ab</sup> |
| 5min    | 24.41±0.59 <sup>b</sup>  | 24.39±1.08 <sup>b</sup>  | 23.35±0.20 <sup>b</sup>  | 24.58±0.38 <sup>b</sup>  | 24.38±0.40 <sup>b</sup>  | 30.44±1.24 <sup>a</sup>  | 31.35±0.73 <sup>a</sup> |
| 10min   | 31.57±1.48 <sup>c</sup>  | 29.92±1.46 <sup>cd</sup> | 27.69±0.56 <sup>d</sup>  | 27.66±0.56 <sup>d</sup>  | 30.27±0.75 <sup>cd</sup> | 35.71±1.77 <sup>b</sup>  | 38.89±2.01 <sup>a</sup> |
| 15min   | 32.95±1.31 <sup>cd</sup> | 34.00±2.12 <sup>bc</sup> | 29.84±0.45 <sup>e</sup>  | 31.01±1.84 <sup>de</sup> | 36.19±1.00 <sup>b</sup>  | 40.89±1.06 <sup>a</sup>  | 43.04±1.08 <sup>a</sup> |
| 20min   | 38.03±1.51 <sup>d</sup>  | 38.41±1.26 <sup>d</sup>  | 37.63±0.99 <sup>d</sup>  | 37.86±2.09 <sup>d</sup>  | 41.65±0.69 <sup>c</sup>  | 45.54±1.61 <sup>b</sup>  | 49.50±1.31 <sup>a</sup> |
| 30min   | 44.33±1.07 <sup>bc</sup> | 42.76±0.48 <sup>e</sup>  | 43.55±0.94 <sup>bc</sup> | 43.56±1.16 <sup>bc</sup> | 45.69±2.18 <sup>b</sup>  | 50.12±0.54 <sup>a</sup>  | 51.77±0.85 <sup>a</sup> |
| 45min   | 48.62±1.08 <sup>d</sup>  | 48.32±0.42 <sup>d</sup>  | 47.84±1.20 <sup>d</sup>  | 50.37±1.35 <sup>d</sup>  | 53.34±2.05 <sup>b</sup>  | 55.99±0.29 <sup>a</sup>  | 57.37±1.57 <sup>a</sup> |
| 60min   | 55.48±0.83 <sup>c</sup>  | 51.82±0.48 <sup>d</sup>  | 53.65±0.76 <sup>bc</sup> | 55.56±2.94 <sup>bc</sup> | 59.02±1.82 <sup>a</sup>  | 58.55±0.71 <sup>ab</sup> | 60.96±1.46 <sup>a</sup> |
| 90min   | 61.50±1.48 <sup>cd</sup> | 59.13±1.62 <sup>d</sup>  | 60.13±0.66 <sup>d</sup>  | 59.97±2.14 <sup>d</sup>  | 63.15±1.57 <sup>bc</sup> | 65.23±1.72 <sup>b</sup>  | 71.02±0.13 <sup>a</sup> |
| 120min  | 64.42±0.33 <sup>c</sup>  | 65.25±0.65 <sup>e</sup>  | 61.98±0.32 <sup>d</sup>  | 61.26±1.86 <sup>d</sup>  | 68.85±0.87 <sup>b</sup>  | 68.43±0.39 <sup>b</sup>  | 74.14±0.67 <sup>a</sup> |
| 180min  | 64.78±0.34 <sup>c</sup>  | 67.15±0.51 <sup>e</sup>  | 65.02±0.87 <sup>c</sup>  | 67.07±3.28 <sup>c</sup>  | 71.57±1.76 <sup>b</sup>  | 74.84±2.68 <sup>ab</sup> | 78.58±1.48 <sup>a</sup> |

Note: Values are expressed as means ± standard deviation and different letters in the same column indicate significant differences ( $p < 0.05$ ).

**Table S2** The blood glucose response data of the multigrain constituted rice and standard glucose (mmol/L).

| Time (min) | T60                      | T70                      | T80                      | T90                       | T100                     | T110                     | T120                     | Glucose                  |
|------------|--------------------------|--------------------------|--------------------------|---------------------------|--------------------------|--------------------------|--------------------------|--------------------------|
| 0          | 5.10±0.05 <sup>b</sup>   | 5.23±0.10 <sup>ab</sup>  | 5.40±0.08 <sup>a</sup>   | 5.06±0.08 <sup>b</sup>    | 5.04±0.05 <sup>b</sup>   | 5.11±0.05 <sup>b</sup>   | 5.16±0.06 <sup>b</sup>   | 5.03±0.01 <sup>b</sup>   |
| 15         | 6.97±0.14 <sup>ef</sup>  | 6.77±0.26 <sup>f</sup>   | 7.30±0.17 <sup>dc</sup>  | 7.81±0.31 <sup>c</sup>    | 7.69±0.28 <sup>cd</sup>  | 8.25±0.27 <sup>b</sup>   | 9.30±0.18 <sup>a</sup>   | 9.43±0.40 <sup>a</sup>   |
| 30         | 8.00±0.13 <sup>bc</sup>  | 7.93±0.19 <sup>c</sup>   | 8.13±0.10 <sup>ab</sup>  | 8.21±0.37 <sup>bc</sup>   | 8.31±0.30 <sup>bc</sup>  | 8.45±0.17 <sup>ab</sup>  | 8.41±0.15 <sup>abc</sup> | 8.83±0.64 <sup>a</sup>   |
| 45         | 7.47±0.25 <sup>b</sup>   | 7.57±0.14 <sup>b</sup>   | 6.97±0.26 <sup>b</sup>   | 7.36±0.45 <sup>b</sup>    | 7.39±0.33 <sup>b</sup>   | 7.15±0.40 <sup>b</sup>   | 7.39±0.21 <sup>b</sup>   | 8.47±0.62 <sup>a</sup>   |
| 60         | 6.60±0.40 <sup>cd</sup>  | 6.43±0.38 <sup>ab</sup>  | 6.37±0.21 <sup>d</sup>   | 6.71±0.25 <sup>bcd</sup>  | 6.80±0.42 <sup>bcd</sup> | 6.85±0.38 <sup>bcd</sup> | 7.06±0.20 <sup>abc</sup> | 7.70±0.82 <sup>a</sup>   |
| 90         | 5.57±0.06 <sup>c</sup>   | 6.20±0.22 <sup>ab</sup>  | 6.30±0.13 <sup>ab</sup>  | 5.97±0.15 <sup>bc</sup>   | 6.16±0.36 <sup>ab</sup>  | 6.05±0.38 <sup>ab</sup>  | 6.35±0.15 <sup>a</sup>   | 6.30±0.32 <sup>ab</sup>  |
| 120        | 5.07±0.08 <sup>a</sup>   | 5.17±0.23 <sup>a</sup>   | 5.87±0.10 <sup>a</sup>   | 5.44±0.13 <sup>a</sup>    | 5.40±0.15 <sup>a</sup>   | 5.53±0.21 <sup>a</sup>   | 5.47±0.25 <sup>a</sup>   | 5.00±0.67 <sup>a</sup>   |
| IAUG       | 166.96±4.99 <sup>d</sup> | 176.61±4.14 <sup>d</sup> | 189.96±6.36 <sup>c</sup> | 201.70±5.73 <sup>bc</sup> | 205.65±5.52 <sup>b</sup> | 205.73±5.22 <sup>b</sup> | 208.20±3.61 <sup>b</sup> | 276.38±5.56 <sup>a</sup> |

Note: IAUG, the area under the glycemic curve.

Values are expressed as means ± standard deviation and different letters in the same column indicate significant differences ( $p < 0.05$ ).

**Table S3** Correlation analysis among structural properties, physicochemical properties, digestive characteristics, estimated glycemic index and glycemic index of the multigrain reconstituted rice.

|              | DG | Cry        | WAI       | WSI        | PV         | TV        | BD        | FV         | SB         | $\Delta H$ | Sen      | $L^*$      | $a^*$      | $b^*$      | Har        | Adh        | Che        | Gum        | CL         | RR         | Exp       | $C_{\infty}$ | RS         | eGI        | GI         |
|--------------|----|------------|-----------|------------|------------|-----------|-----------|------------|------------|------------|----------|------------|------------|------------|------------|------------|------------|------------|------------|------------|-----------|--------------|------------|------------|------------|
| DG           | 1  | -0.98771** | 0.87343*  | 0.90015**  | -0.92820** | -0.85986* | -0.59446  | -0.95882** | -0.95226** | -0.98457** | 0.15805  | -0.87540** | 0.89542**  | 0.98790**  | -0.92005** | 0.96417**  | -0.91171** | -0.90665** | 0.99154**  | 0.90232**  | 0.82956*  | 0.90097**    | -0.96067** | 0.88560**  | 0.94714**  |
| Cry          |    | 1          | -0.86045* | -0.91144** | 0.93262**  | 0.83312*  | 0.62265   | 0.96707**  | 0.98274**  | 0.99462**  | -0.14151 | 0.85046*   | -0.92188** | -0.98576** | 0.91579**  | -0.97080** | 0.94665**  | 0.94511**  | -0.97982** | -0.95266** | -0.85017* | -0.88006**   | 0.98246**  | -0.86348*  | -0.9536**  |
| WAI          |    |            | 1         | 0.94477**  | -0.94923** | -0.69991  | -0.75552* | -0.84868*  | -0.88281** | -0.87616** | -0.30246 | -0.87721** | 0.89573**  | 0.92109**  | -0.79506*  | 0.88610**  | -0.88462** | -0.89223** | 0.91572**  | 0.77327*   | 0.64804   | 0.95488**    | -0.90133** | 0.97609**  | 0.75596*   |
| WSI          |    |            |           | 1          | -0.95144** | -0.65269  | -0.79746* | -0.85902*  | -0.92997** | -0.94122** | -0.17902 | -0.88931** | 0.95518**  | 0.94458**  | -0.79531*  | 0.91835**  | -0.97407** | -0.97390** | 0.91867**  | 0.90038**  | 0.74444   | 0.96017**    | -0.94861** | 0.96399**  | 0.81830*   |
| PV           |    |            |           |            | 1          | 0.71230   | 0.81652*  | 0.88701**  | 0.93523**  | 0.94455**  | 0.20404  | 0.88097**  | -0.88319** | -0.96999** | 0.91539**  | -0.94887** | 0.92410**  | 0.93546**  | -0.94002** | -0.85985*  | -0.64409  | -0.96723**   | 0.93375**  | -0.96097** | -0.79979*  |
| TV           |    |            |           |            |            | 1         | 0.17641   | 0.93066**  | 0.81631*   | 0.79006*   | -0.30968 | 0.82124*   | -0.75962*  | -0.79818*  | 0.84313*   | -0.86475*  | 0.70652    | 0.69521    | -0.87898** | -0.69443   | -0.76683* | -0.63290     | 0.81498*   | -0.66505   | -0.90452** |
| BD           |    |            |           |            |            |           | 1         | 0.47846    | 0.64014    | 0.67480    | 0.54087  | 0.56000    | -0.61379   | -0.70379   | 0.59025    | -0.61942   | 0.71484    | 0.74006    | -0.59532   | -0.63468   | -0.27253  | -0.83587*    | 0.63915    | -0.80066*  | -0.37763   |
| FV           |    |            |           |            |            |           |           | 1          | 0.97105**  | 0.94522**  | -0.15071 | 0.88521**  | -0.92278** | -0.94205** | 0.91330**  | -0.97451** | 0.90891**  | 0.90556**  | -0.97364** | -0.89639** | -0.85109* | -0.80940*    | 0.96763**  | -0.82362*  | -0.96658** |
| SB           |    |            |           |            |            |           |           |            | 1          | 0.97637**  | -0.03575 | 0.86127*   | -0.96081** | -0.96606** | 0.89132**  | -0.97384** | 0.97358**  | 0.97568**  | -0.96318** | -0.96171** | -0.84294* | -0.86455*    | 0.99547**  | -0.86601*  | -0.93536** |
| $\Delta H$   |    |            |           |            |            |           |           |            |            | 1          | -0.10035 | 0.86265*   | -0.93129** | -0.99041** | 0.89867**  | -0.96624** | 0.96217**  | 0.95946**  | -0.97539** | -0.95719** | -0.83930* | -0.91221**   | 0.98179**  | -0.89331** | -0.93575** |
| Sen          |    |            |           |            |            |           |           |            |            |            | 1        | 0.08905    | -0.02714   | 0.02070    | -0.04048   | 0.02476    | 0.04303    | 0.08053    | 0.07954    | 0.14722    | 0.43278   | -0.22719     | -0.04142   | -0.27565   | 0.35412    |
| $L^*$        |    |            |           |            |            |           |           |            |            |            |          | 1          | -0.88117** | -0.87582** | 0.86084*   | -0.93810** | 0.86634*   | 0.85761*   | -0.90702** | -0.75953*  | -0.66309  | -0.87402*    | 0.87652**  | -0.91390** | -0.82053*  |
| $a^*$        |    |            |           |            |            |           |           |            |            |            |          |            | 1          | 0.91611**  | -0.76957*  | 0.92730**  | -0.98093** | -0.97465** | 0.92520**  | 0.93237**  | 0.86883*  | 0.85535*     | -0.97601** | 0.87866**  | 0.90447**  |
| $b^*$        |    |            |           |            |            |           |           |            |            |            |          |            |            | 1          | -0.91390** | 0.96629**  | -0.94207** | -0.94317** | 0.98653**  | 0.91554**  | 0.79081*  | 0.94432**    | -0.97279** | 0.92938**  | 0.90807**  |
| Har          |    |            |           |            |            |           |           |            |            |            |          |            |            |            | 1          | -0.95069** | 0.81568*   | 0.82386*   | -0.91335** | -0.79704*  | -0.60896  | -0.82751*    | 0.86944*   | -0.81900*  | -0.83177*  |
| Adh          |    |            |           |            |            |           |           |            |            |            |          |            |            |            |            | 1          | -0.94202** | -0.94167** | 0.97481**  | 0.90444**  | 0.77264*  | 0.88838**    | -0.97015** | 0.89748**  | 0.92154**  |
| Che          |    |            |           |            |            |           |           |            |            |            |          |            |            |            |            |            | 1          | 0.99833**  | -0.92378** | -0.96818** | -0.82846* | -0.88996**   | 0.98043**  | -0.89242** | -0.88778** |
| Gum          |    |            |           |            |            |           |           |            |            |            |          |            |            |            |            |            |            | 1          | -0.92016** | -0.96506** | -0.80565* | -0.89398**   | 0.97884**  | -0.89554** | -0.87282*  |
| CL           |    |            |           |            |            |           |           |            |            |            |          |            |            |            |            |            |            |            | 1          | 0.89030**  | 0.82556*  | 0.91022**    | -0.97304** | 0.91135**  | 0.94243**  |
| RR           |    |            |           |            |            |           |           |            |            |            |          |            |            |            |            |            |            |            |            | 1          | 0.87937** | 0.80072*     | -0.95951** | 0.77975*   | 0.91470**  |
| Exp          |    |            |           |            |            |           |           |            |            |            |          |            |            |            |            |            |            |            |            |            | 1         | 0.62000      | -0.86599*  | 0.61747    | 0.94292**  |
| $C_{\infty}$ |    |            |           |            |            |           |           |            |            |            |          |            |            |            |            |            |            |            |            |            |           | 1            | -0.88508** | 0.99009**  | 0.74656    |
| RS           |    |            |           |            |            |           |           |            |            |            |          |            |            |            |            |            |            |            |            |            |           |              | 1          | -0.88813** | -0.94316** |
| eGI          |    |            |           |            |            |           |           |            |            |            |          |            |            |            |            |            |            |            |            |            |           |              |            | 1          | 0.74593    |
| GI           |    |            |           |            |            |           |           |            |            |            |          |            |            |            |            |            |            |            |            |            |           |              |            |            | 1          |

Note: DG = degree of gelatinization; Cry = crystallinity; WAI = water solubility index; WSI = water absorption index; PV = peak viscosity; TV = trough viscosity; BD = breakdown; FV = final viscosity; SB = setback;  $\Delta H$  = heat absorption enthalpy; Sen = sensory;  $L^*$  = lightness;  $a^*$  = redness;  $b^*$  = yellowness; Har = hardness; Adh = adhesiveness; Che = chewiness; Gum = gumminess; CL = cooking loss; RR = rehydration ratio; Exp = expansivity; ;  $C_{\infty}$  = the starch digestibility at the end of digestion; RS = resistant starch; eGI = estimated glycemic index; GI = glycemic index. \* Represents significant difference between data,  $p < 0.05$ ; \*\* represents extremely significant difference between data,  $p < 0.01$ .

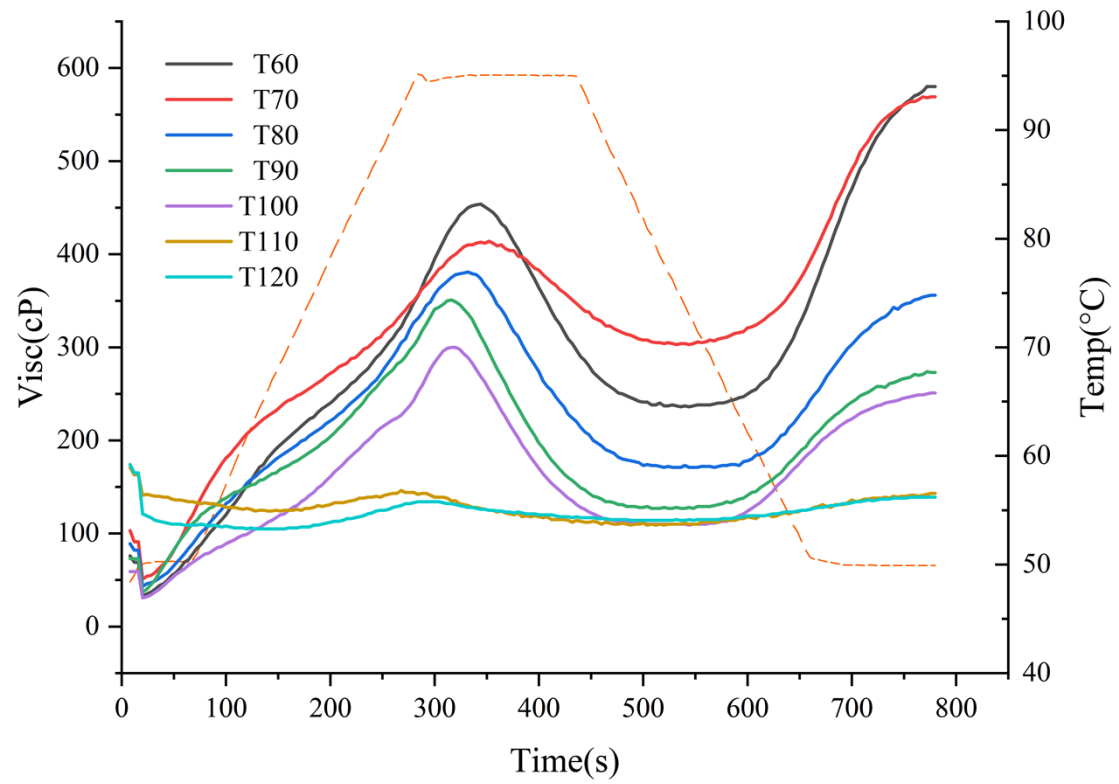

**Fig.S1** Pasting properties of the multigrain reconstituted rice.
